# Supplementary material for: A TiO2–SnS2 nanocomposite as a novel matrix for the development of an enzymatic electrochemical glucose biosensor
Source: Royal Society of Chemistry journal article supplement (doi:10.1039/c9nj04629a), 2019-01-01
Supplement: c9nj04629a1.pdf [file c9nj04629a1.pdf]

Electronic Supplementary Information (ESI) for New Journal of Chemistry

This journal is (c) The Royal Society of Chemistry 2019

## **TiO<sub>2</sub>-SnS<sub>2</sub> nanocomposite as novel matrix for development of enzymatic electrochemical glucose biosensor**

**Pei Yao,<sup>a,c</sup> Suhua Yu,<sup>a</sup> Huifang Shen,<sup>a</sup> Juan Yang,<sup>a</sup> Lingfeng Min,<sup>b,\*</sup> Zhanjun Yang,<sup>a,\*</sup> Xiashi Zhu<sup>a,\*</sup>**

*<sup>a</sup>School of Chemistry and Chemical Engineering, Yangzhou University, Yangzhou 225002, PR China*

*<sup>b</sup>Department of Laboratory Medicine and Clinical Medical College of Yangzhou University; Subei Peoples' Hospital of Jiangsu Province, Yangzhou, 225001, P.R. China*

*<sup>c</sup>School of Chemical and Pharmaceutical Engineering, Changzhou Vocational Institute of Engineering, Changzhou, 213164, PR China*

### **Experimental**

**Materials and Reagents:** GOx ( EC 1.1.3.4, 10800 U·g<sup>-1</sup>, derived from *Aspergillus niger*) was bought from Amresco. D-(+)-Glucose and Nafion were obtained from Sigma-Aldrich Chemical Company (Mainland, China). Tin (IV) chloride dehydrate (SnCl<sub>4</sub>·5H<sub>2</sub>O), thioacetamide (CH<sub>3</sub>CSNH<sub>2</sub>), citric acid, and tetrabutyl titanate (TBT) were purchased from Sinopharm Chemical Reagent Co., Ltd. A D-glucose stock solution (0.1 M) was prepared and allowed to mutarotate overnight prior to use. Phosphate buffer saline (PBS, 0.1 M Na<sub>2</sub>HPO<sub>4</sub>-NaH<sub>2</sub>PO<sub>4</sub>-KCl) and its different pH values were adjusted with H<sub>3</sub>PO<sub>4</sub> or NaOH solutions. All reagents are of analytical grade, and used without purification and prepared using distilled water.

**Apparatus:** The electrochemical experiments such as cyclic voltammetry (CV) were carried out on a CHI 660E electrochemical workstation (Shanghai Chenhua, China). A three-electrode system was employed with a glassy carbon electrode (GCE, 3 mm in diameter), a saturated calomel electrode (SCE) as reference electrode and Pt wire as the auxiliary electrode. Scanning electron micrographs (SEM, S-

4800, Japan) were obtained at 15 kV acceleration voltage. A FT-IR spectrum was conducted by the German spectrometer of tensor 27 Bruker FT-IR. X-ray photoelectron spectroscopic (XPS) spectrum was obtained with an ESCALAB 250Xi spectrometer (USA).

**The synthesis of TiO<sub>2</sub>-SnS<sub>2</sub> nanocomposite :** The SnS<sub>2</sub> precursor nanomaterials were prepared by a simple hydrothermal procedure<sup>S1</sup>. 5 mM SnCl<sub>4</sub> ·5H<sub>2</sub>O was dissolved in 30 mL deionized water with ultrasonic dispersion for 5 min. Then 10 mL 0.5 M of citric acid and 10 mM CH<sub>3</sub>CSNH<sub>2</sub> were dropped to the solution. The mentioned solution was dealt with ultrasonic dispersion for 20 min, and finally was put into 50 mL Teflon-lined stainless steel autoclave and heated at the temperature of 160°C for 12 h. After the autoclave was cooled to room temperature naturally, the yellow precipitate was filtered and washed with deionized water several times. The product was dried in a vacuum at 100 °C for 4 h.

0.4 g SnS<sub>2</sub>, 4 mL glacial acetic acid and anhydrous ethanol were added successively in the Teflon liner and mixed homogeneously by stirring. After TBT was dropped to the solution with continuous stirring for 5 min, then the mixture was transferred into Teflon-lined stainless steel autoclave and heated under the temperature of 180 °C for 12 h. The yellow precipitate was filtered and washed with deionized water several times. After being dried in a vacuum at 100 °C for 4 h, the nanocomposite of TiO<sub>2</sub>-SnS<sub>2</sub> was finally obtained.

**Preparation of enzyme biosensor:** The GCE was polished with 0.3 and 0.05 μm alumina powder (Buhler), then sonicated in HNO<sub>3</sub>/acetone(1:1) and distilled water for 20 min, respectively. 1.0 mg TiO<sub>2</sub>-SnS<sub>2</sub> was dispersed in 1.0 mL distilled water and sonicated for 30 min. and 10 mg of GOx was added to 1.0 mL the TiO<sub>2</sub>-SnS<sub>2</sub> suspension (1.0 mg·mL<sup>-1</sup>) under gentle stirring for 15 min. Afterwards, 5.0 μL of GOx/TiO<sub>2</sub>-SnS<sub>2</sub> suspension was coated on surface of GCE and dried in refrigerator. Finally, 5.0 μL of Nafion (0.5%) was dropped on enzyme electrode. The GOx/TiO<sub>2</sub>-SnS<sub>2</sub>/Nafion/GCE was rinsed thoroughly with distilled water to get rid of the loosely adsorbed GOx molecules. When not in use, the enzyme electrodes were placed in the 0.1M PBS (pH=7.0) and stored at 4 °C in a refrigerator.

## References

S1 Z. J. Yang, Y. Tang, J. Li, Y. C. Zhang, X. Y. Hu, *Biosens. Bioelectron.*, 2014, **54**, 528–533.

## XPS spectrum for characterization of the biosensor

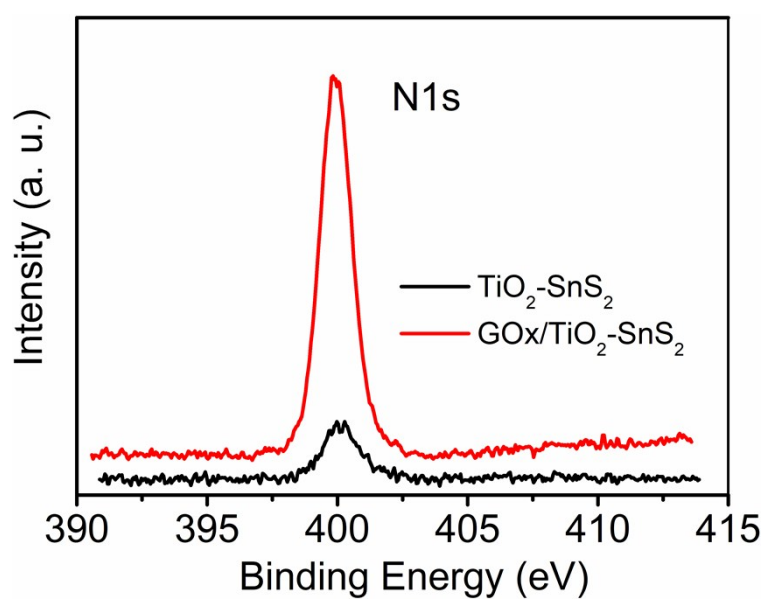

Fig. S1. XPS of N 1s peak of  $\text{TiO}_2\text{-SnS}_2$  composite and  $\text{GOx/TiO}_2\text{-SnS}_2$ .
